# Supplementary material for: Dietary Supplementation with 20-Hydroxyecdysone Ameliorates Hepatic Steatosis and Reduces White Adipose Tissue Mass in Ovariectomized Rats Fed a High-Fat, High-Fructose Diet
Source: MDPI journal article supplement (doi:10.3390/biomedicines11072071), 2023-07-23

## Supplementary Figure S1

Non-processed Western blot images shown in Figure 3A

The dot box outlines the area presented in the Figure 3A

### C-digit-Blot-liver-AMPK

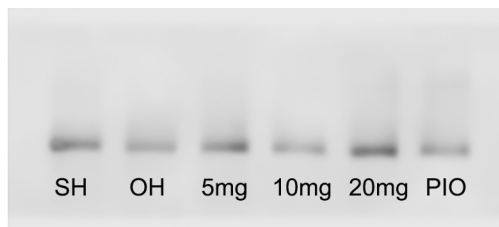

### C-digit-Blot-liver-pAMPK-Thr172

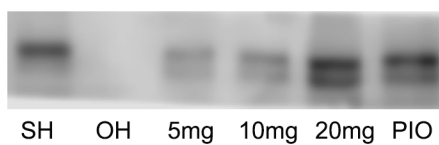

### C-digit-Blot-liver-GAPDH

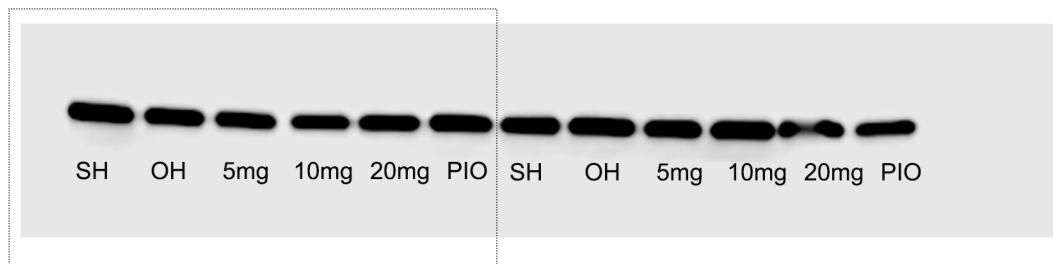

**Supplementary Figure S2**

**Non-processed Western blot images shown in Figure 4A**  
**The dot box outlines the area presented in the Figure 4A**

**C-digit-Blot-liver-ACC**

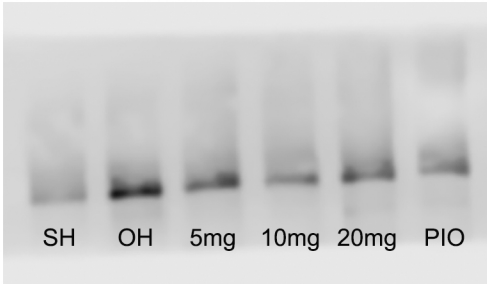

**C-digit-Blot-liver-pACC-Ser79**

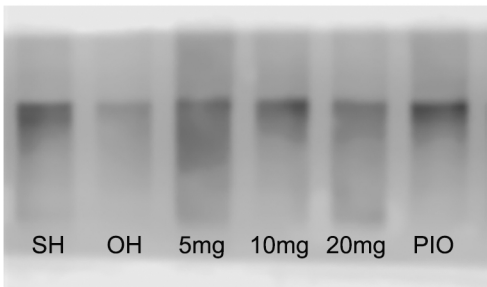

**C-digit-Blot-liver-FAS**

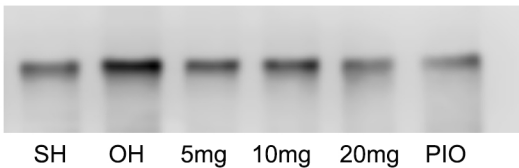

**C-digit-Blot-liver-GAPDH**

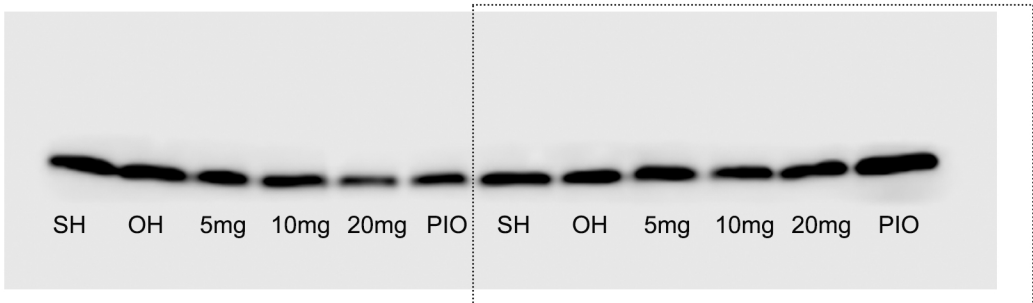

**Supplementary Figure S3**

**Non-processed Western blot images shown in Figure 4F**  
**The dot box outlines the area presented in the Figure 4F**

**C-digit-Blot-liver-CPT-1**

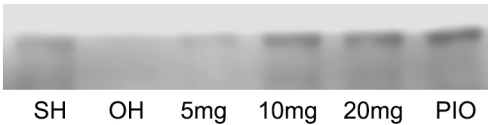

**C-digit-Blot-liver-GAPDH**

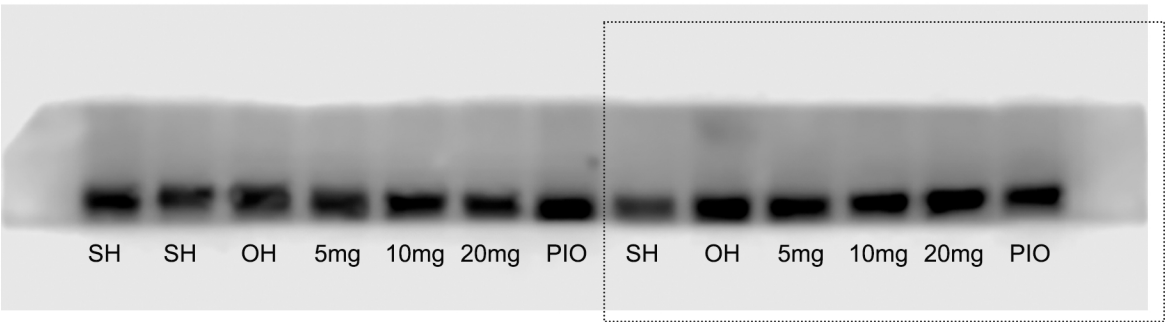

**Supplementary Figure S4**  
**Non-processed Western blot images shown in Figure 5A**

**C-digit-Blot-adipose-AMPK**

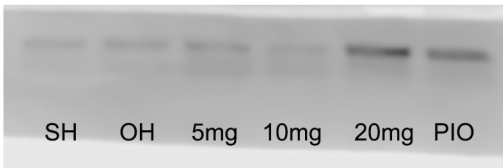

**C-digit-Blot-adipose-pAMPK-Thr172**

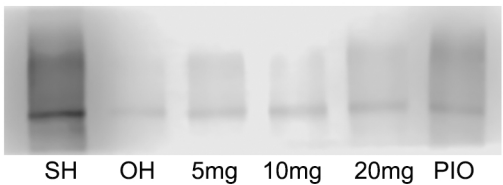

**C-digit-Blot-adipose-GAPDH**

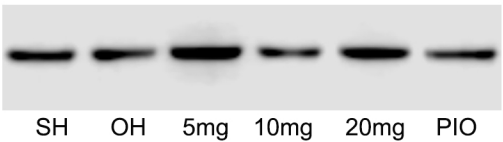

**Supplementary Figure S5**

**Non-processed Western blot images shown in Figure 6A**  
**The dot boxes outline the areas presented in the Figure 6A**

**C-digit-Blot-adipose-ACC**

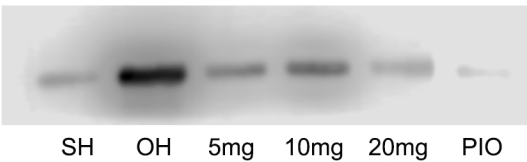

**C-digit-Blot-adipose-pACC-Ser79**

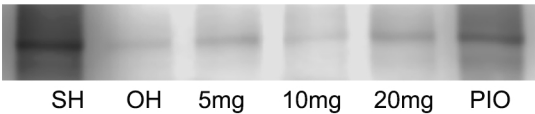

**C-digit-Blot-adipose-FAS**

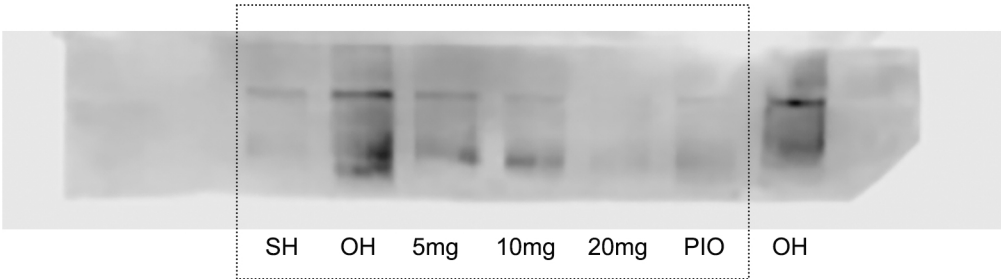

**C-digit-Blot-adipose-GAPDH**

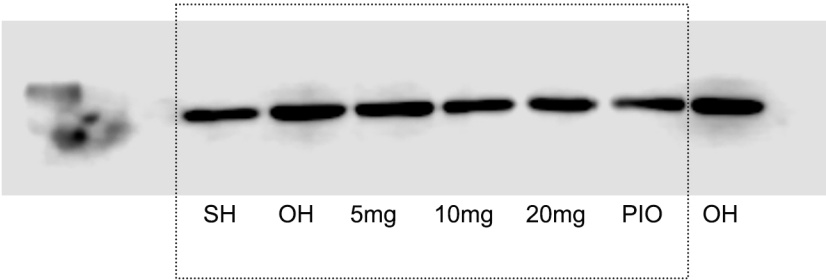

**Supplementary Figure S6**

**Non-processed Western blot images shown in Figure 6F**

**C-digit-Blot-adipose-SREBP-1C**

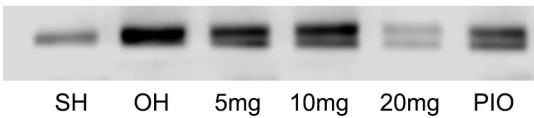

**C-digit-Blot-adipose-GAPDH**

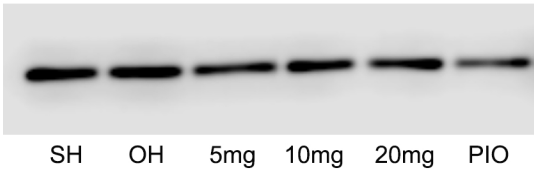

Supplement: s1 [file s1]
